# Supplementary material for: Development and validation of a lung graph–based machine learning model to predict acute pulmonary thromboembolism on chest noncontrast computed tomography
Source: PubMed Central journal article supplement — Quant Imaging Med Surg. 2023 Sep 1;13(10):6710–23. doi: 10.21037/qims-22-1059 (PMC10585544; doi:10.21037/qims-22-1059), 2023-09-01
Supplement: qims-13-10-6710-supplementary.pdf [file qims-13-10-6710-supplementary.pdf]

**Table S1** The selected ranges of the evaluated hyperparameters in the machine learning methods

| Method                          | Hyperparameters                                                                                                                                                        |
|---------------------------------|------------------------------------------------------------------------------------------------------------------------------------------------------------------------|
| Naïve Bayes                     | Using GaussianNB(), not hyperparameters setting                                                                                                                        |
| Decision tree                   | max_depth=[50, 100, 150, 200),<br>min_samples_leaf=[5, 10, 15),<br>criterion=['entropy']                                                                               |
| k-nearest neighbors             | n_neighbors=[6, 7, 8, 9), P=[2, 3)                                                                                                                                     |
| Logistic regression             | penalty=['l1', 'l2'), C=[0.001, 0.01, 0.1), tol=[1e-3, 1e-4), max_iter=[300, 400, 500), solver=['liblinear']                                                           |
| Multilayer perceptron           | hidden_layer_sizes=[(3,),(10,)]<br>solver=['sgd']<br>learning_rate_init=[0.01, 0.1, 0.5)<br>learning_rate=['adaptive']<br>max_iter=[100, 200, 300)<br>tol=[1e-2, 1e-3) |
| Random forest                   | n_estimators=[100, 200, 300)<br>max_depth=[50, 100)                                                                                                                    |
| Support vector machine          | kernel=['linear', 'sigmoid')<br>probability=[True)<br>C=[0.01, 0.1, 10)                                                                                                |
| Gradient boosting decision tree | objective=['binary: logistic')<br>n_estimators=[50, 500)<br>max_depth=[3, 5, 7, 9)<br>learning_rate=[0.05, 0.1, 0.5)<br>eval_metric=['auc']                            |

The parameter random\_state in the above methods was set to 7052.

**Table S2** Hyperparameter setting of the selected gradient boosting decision trees

| Hyperparameter | Setting          |
|----------------|------------------|
| Objective      | binary: logistic |
| n_estimators   | 500              |
| max_depth      | 5                |
| learning_rate  | 0.5              |
| eval_metric    | "auc"            |
| random_state   | 7052             |

Note: Other hyperparameters were the default values in scikit-learn package.
